# Supplementary material for: Molecular dietary analysis of two sympatric felids in the Mountains of Southwest China biodiversity hotspot and conservation implications
Source: PubMed Central journal article supplement (PMC5307313; doi:10.1038/srep41909), 2017-02-14
Supplement: srep41909-s1.pdf [file srep41909-s1.pdf]

1 **Molecular dietary analysis of two sympatric felids in the Mountains of Southwest**

2 **China biodiversity hotspot and conservation implications**

3

4 Mengyin Xiong, Dajun Wang, Hongliang Bu, Xinning Shao, Dan Zhang, Sheng Li,

5 Rongjiang Wang and Meng Yao \*

6 School of Life Sciences, Peking University, Beijing 100871, China

7

8 \* Corresponding author email: yaom@pku.edu.cn

9

10 **Appendix S1**

11 Comparison of the PCR amplification of seven DNA extractions of Asiatic golden cat  
12 faecal samples with 12SV5 primers without (on the left) and with (on the right) the  
13 blocking oligonucleotide PrioB. PCR products were cloned into a sequencing vector  
14 and five independent clones were sequenced for each PCR. Each horizontal bar  
15 represents the sequencing results of a faecal DNA sample, and the different colours  
16 represent the proportions of clones containing the sequences of the predator or prey  
17 items in the sample.

18

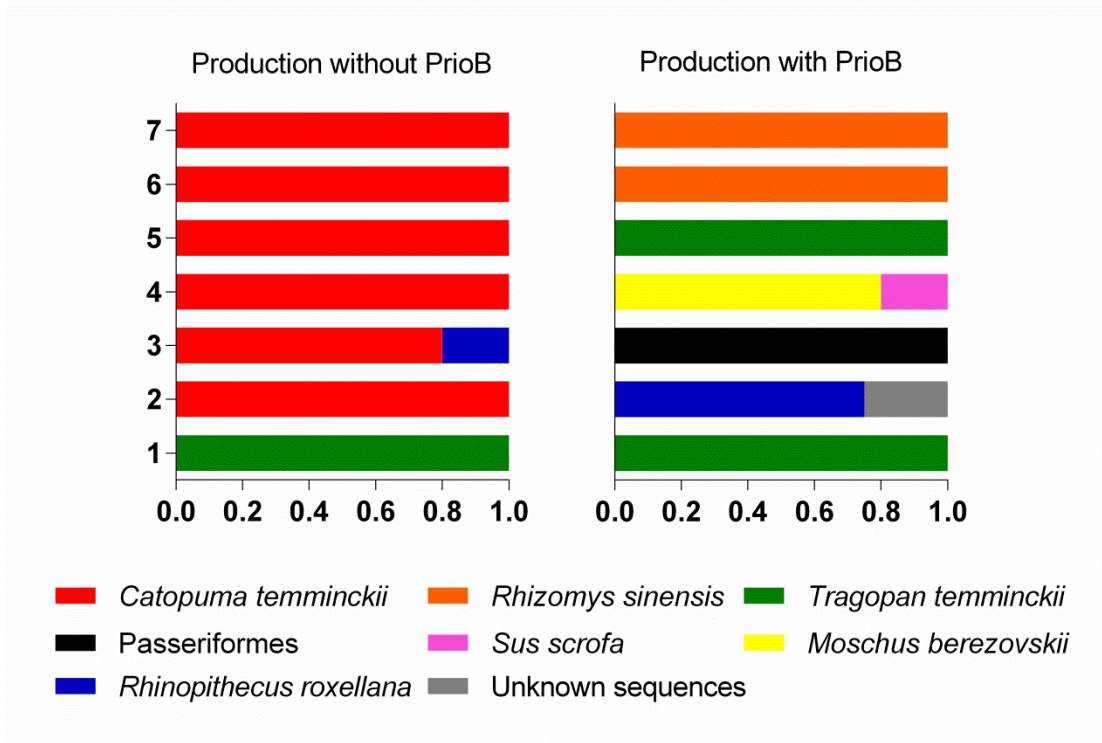

19

20

21 **Appendix S2**

22 Sequence alignment of the PrioB blocking oligonucleotide with sequences of the  
 23 leopard cat and Asiatic golden cat and representative vertebrate species commonly  
 24 occurring in the study area (pika: *Ochotona curzoniae*; rodents: *Niviventer*  
 25 *confucianus*, *Apodemus draco* and *Rhizomys sinensis*; shrew: *Episoriculus macrurus*;  
 26 primate: *Rhinopithecus roxellana*; ungulates: *Sus scrofa*, *Budorcas taxicolor* and  
 27 *Elaphodus cephalophus*; birds: *Garrulax ocellatus* and *Tragopan temminckii*). Dots (.)  
 28 indicate identical nucleotides as PrioB; dashes (–) indicate gaps in the sequence  
 29 compared to PrioB.

30

| Species                         | Accession no. | Sequences (5'–3')                                |
|---------------------------------|---------------|--------------------------------------------------|
| PrioB                           |               | CTATGCTTAGCCCTAAACTTAGATAGTTAATTTTAAACAAAACCTATC |
| <i>Prionailurus bengalensis</i> | JN392459.1    | .....T.....CA.....                               |
| <i>Catopuma temminckii</i>      | KR132594.1    | .....T.....CA.....                               |
| <i>Ochotona curzoniae</i>       | KM225729.1    | .....C.....A.....C.....-CACA-.....T              |
| <i>Niviventer confucianus</i>   | KJ152220.1    | .....T.....C..A...A...-AACCT.....A...T           |
| <i>Apodemus draco</i>           | HQ333255.1    | .....T.....C.CA...A..T-GACA-.....T...T           |
| <i>Rhizomys sinensis</i>        | AF326254.1    | .....G.....C..AG..A..C-.....T..CT                |
| <i>Episoriculus macrurus</i>    | GU981048.1    | .....C.....C..AG..A..--...A.....T..C.            |
| <i>Rhinopithecus roxellana</i>  | JQ821835.1    | .....T.....TA.....C.-AAAC.....G.....T            |
| <i>Sus scrofa</i>               | KM275217.1    | .....C.....CC.A.....-CA.A-.....T                 |
| <i>Budorcas taxicolor</i>       | FJ006534.1    | .....A..A..A..G-CAAA.....G.T...T                 |
| <i>Elaphodus cephalophus</i>    | AY184436.1    | .....C.....T.....AC.A...A..T-CA.A.....T...T      |
| <i>Garrulax ocellatus</i>       | AF484898.1    | .....C.G.....TC.T...GC.CG-A.C...CGG.GC...        |
| <i>Tragopan temminckii</i>      | FJ752427.1    | .....C.....TCC.....CCC---.CCT..CT.CG....         |

31

32

33 **Appendix S3**

34 The equations for calculating dietary parameters.

35 Dietary specialisation was estimated by the standardised Levins' measure of  
36 niche breadth ( $B_A$ )<sup>1</sup> at the taxon level:

37 
$$B = \frac{1}{\sum p_i^2} \quad (1)$$

38 Standardised as:  $B_A = \frac{B-1}{n-1}$  (2)

39 where  $B$  is Levins' measure of niche breadth<sup>2</sup>,  $p_i$  is the percent frequency of  
40 occurrence of the  $i$ th food resource (i.e. %TX <sub>$i$</sub> ) and  $n$  is the total number of resources  
41 in the diet.

42 Dietary diversity was also measured by Shannon's diversity index ( $H$ ) at the  
43 taxon level:

44 
$$H = -\sum p_i \ln(p_i) \quad (3)$$

45 Evenness of diet was estimated with Peilou's  $J$  at the taxon level:

46 
$$J = \frac{H}{\ln(n)} \quad (4)$$

47 We used Pianka's measure of niche overlap<sup>3</sup> to estimate dietary overlap between  
48 spring (March–May) and autumn (September–November) for the LPC diet at the  
49 taxon level:

50 
$$O_{jk} = \frac{\sum_i^n p_{ij} p_{ik}}{\sqrt{\sum_i^n p_{ij}^2 \sum_i^n p_{ik}^2}} \quad (5)$$

51 where  $O_{jk}$  is Pianka's measure of niche overlap between species  $j$  and  $k$ ,  $p_{ij}$  is the  
52 proportion of the  $i$ th resource of the total resources used by species  $j$  (i.e. %TX <sub>$ij$</sub> ),  $p_{ik}$   
53 is the proportion of the  $i$ th resource of the total resources used by species  $k$  (i.e. %TX <sub>$ik$</sub> )  
54 and  $n$  is the total number of resource states (i.e. total number of prey taxa). We used

55 the software EcoSim version 7.72 (<http://www.garyentsminger.com/ecosim/>) to test  
56 whether niche overlap was greater than expected by chance by generating 10,000  
57 simulated matrices of a randomised diet composition.

58

59

## 60 **References**

- 61 1 Hurlbert, S. H. The measurement of niche overlap and some relatives. *Ecology*  
62 **59**, 67-77 (1978).
- 63 2 Levins, R. *Evolution in changing environments: some theoretical explorations*.  
64 (Princeton University Press, 1968).
- 65 3 Pianka, E. R. The structure of lizard communities. *Annu. Rev. Ecol. Syst.* **4**,  
66 53-74 (1973).

67

68

69

70 **Appendix S4**

71 Altitudinal variations in diet composition by the prey orders identified in the leopard

72 cat diet in northern Sichuan, China. < 1,500 m:  $n = 15$ ; 1,500–2,000 m:  $n = 32$ ;

73 2,000–2,500 m:  $n = 31$ ; > 2,500 m:  $n = 13$ . Diet composition is presented as a percent

74 frequency of occurrence (%FC).

75

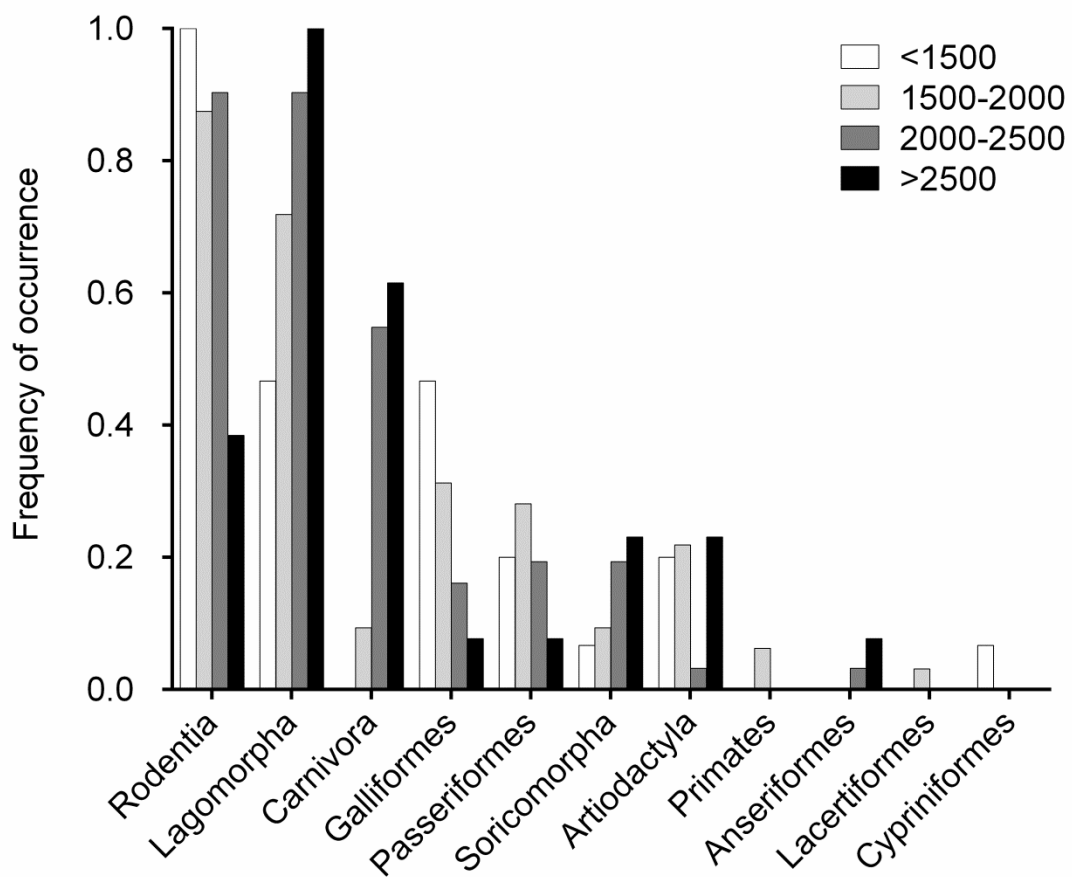

76
